# Supplementary material for: Cloud-Based Monitoring and Evaluation of the Spatial-Temporal Distribution of Southeast Asia’s Mangroves Using Deep Learning
Source: MDPI journal article supplement (doi:10.3390/rs14102291), 2022-05-10
Supplement: s1 [file s1]

# Supplementary Figures

## Notebook 1 - Export Patches

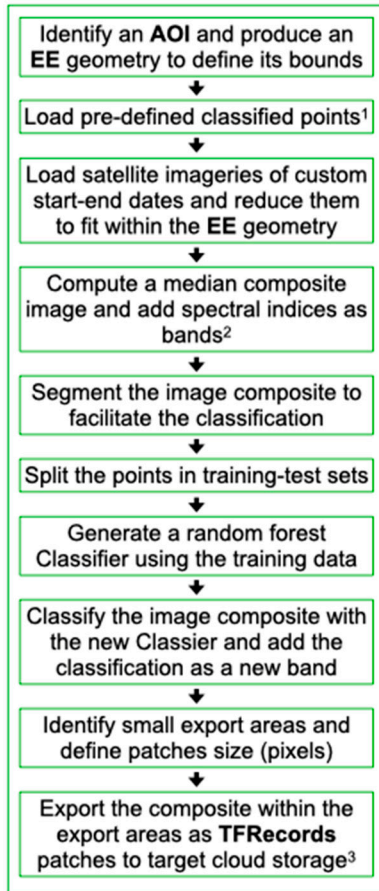

## Notebook 2 - Generate Model

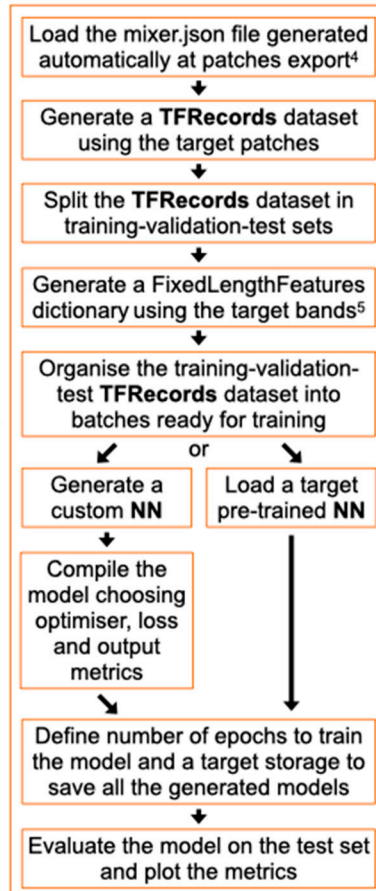

## Notebook 3 - Make Predictions

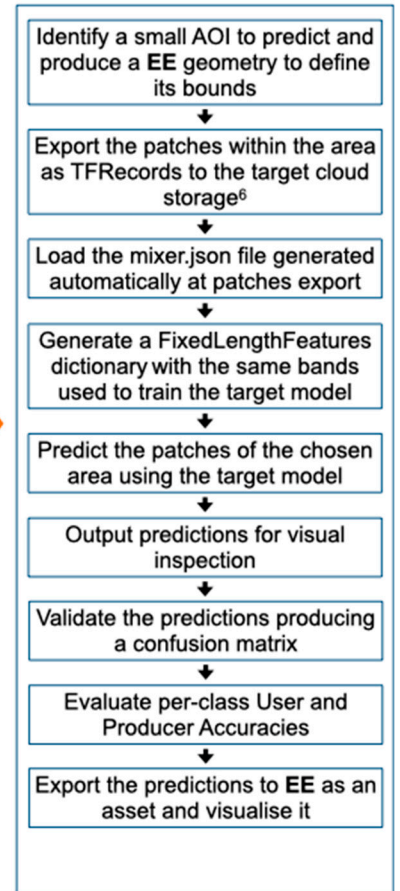

<sup>1</sup> In this project the points were manually defined to distinguish between LCT using EE drawing tools.

<sup>2</sup> Spectral Indices are computed using a custom package (see section 3.2).

<sup>3</sup> The cloud storage can be either GD or GCB.

<sup>4</sup> The mixer.json file contains the size and number of the exported patches.

<sup>5</sup> Each TFRecord will store a dictionary of features of known size for each of its bands.

<sup>6</sup> The user must use GCB if intending to export the image with the predictions to EE as an asset.

- AOI : Area of Interest
- GD : Google Drive
- GCB : Google Cloud Bucket
- TF : TensorFlow
- LCT : Land Cover Types
- NN : Neural Network

**Figure S1.** The monitoring framework is composed of three Google Collaboratory Notebooks.

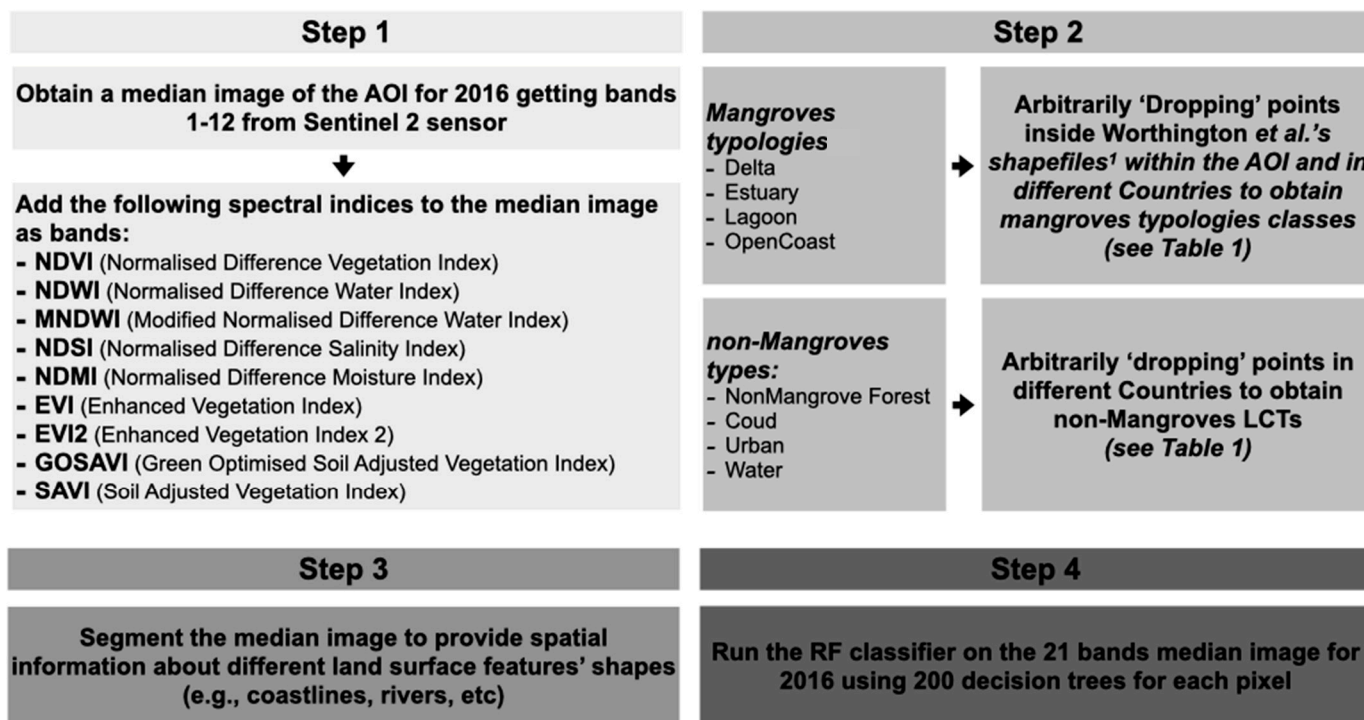

**Figure S2.** Steps followed to (Step1) obtain the 2016 median image of the Area of Interest (AOI) in Figure 1 and obtain spectral indices, (Step 2) identify Land Cover Types (LCTs), (Step 3) segment the image, and (Step 4) run the Random Forest (RF) classifier. <sup>1</sup> Refer to ref. [50] in the reference list of the main text.
